# Supplementary material
Source: Springer Nature journal article supplement (https://www.springermedizin.de/resource/supplementary/13058_2013_3568_MOESM4_ESM.pdf/9703656)
Supplement: MOESM4 [file 9703656]

|                | GEM Dataset (n=1752) |              |                                  | NHS Dataset (n=2011) |              |                                   |
|----------------|----------------------|--------------|----------------------------------|----------------------|--------------|-----------------------------------|
|                | MR Freq (%)          | GEM Freq (%) | Concordance (%<br>, Kappa)       | MR Freq (%)          | TMA Freq (%) | Concordance (%<br>, Kappa)        |
| <b>ER+/PR+</b> | 1089 (62%)           | 672 (38%)    | 590/1089 (54%, $\kappa = 0.37$ ) | 1325 (66%)           | 1215 (60%)   | 1083/1215 (89%, $\kappa = 0.60$ ) |
| <b>ER+/PR-</b> | 235 (13%)            | 622 (36%)    | 148/235 (63%, $\kappa = 0.19$ )  | 262 (13%)            | 316 (16%)    | 132/316 (42%, $\kappa = 0.37$ )   |
| <b>ER-/PR-</b> | 366 (21%)            | 422 (24%)    | 287/366 (78%, $\kappa = 0.65$ )  | 398 (20%)            | 409 (20%)    | 284/409 (69%, $\kappa = 0.63$ )   |
| <b>ER-/PR+</b> | 62 (4%)              | 36 (2%)      | 2/62 (3%, $\kappa = 0.02$ )      | 26 (1%)              | 71 (4%)      | 4/71 (6%, $\kappa = 0.06$ )       |
